# Supplementary material for: Hybrid exciton-plasmon-polaritons in van der Waals semiconductor gratings
Source: Springer Nature journal article supplement (doi:10.1038/s41467-020-17313-2), 2020-07-15
Supplement: 41467_2020_17313_MOESM2_ESM.pdf [file 41467_2020_17313_MOESM2_ESM.pdf]

## Description of Additional Supplementary File

### Supplementary Video 1

**Description:** Evolution of hybrid modes dispersion with WS<sub>2</sub> resonator width (200-500 nm) at a fixed period of 500 nm and thickness ranging from 10-50 nm. Higher orders of surface plasmon resonances emerge as the width increases.
